# Supplementary material
Source: PubMed Central journal article supplement (PMC7456223)
Supplement: jci-130-134682-s240.pdf [file jci-130-134682-s240.pdf]

## **Supplemental Data**

### **GJA1-20k Deficiency Leads to Sudden Deaths via Limiting Connexin43 Trafficking**

Shaohua Xiao, Daisuke Shimura, Rachel Baum, Diana M Hernandez, Sosse Agvanian, Yoshiko Nagaoka, Makoto Katsumata, Paul D Lampe, André G Kléber, TingTing Hong, Robin M Shaw

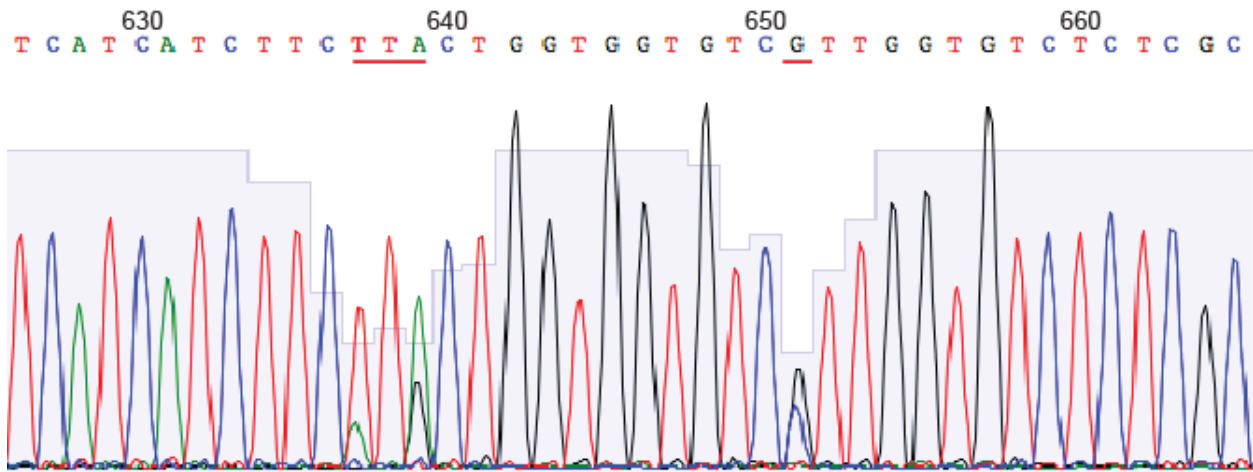

**Supplemental Figure 1. Genomic sequence flanking the targeted ATG to TTA mutation in the founder of a *GJAI*<sup>M213L</sup> mouse clone used in this study.** The sequence confirms the successful mutation of ATG to TTA, which results in the M213L mutation in Cx43, and TCC to TCG, a silent mutation to disrupt a nearby PAM. The mutations are underlined.

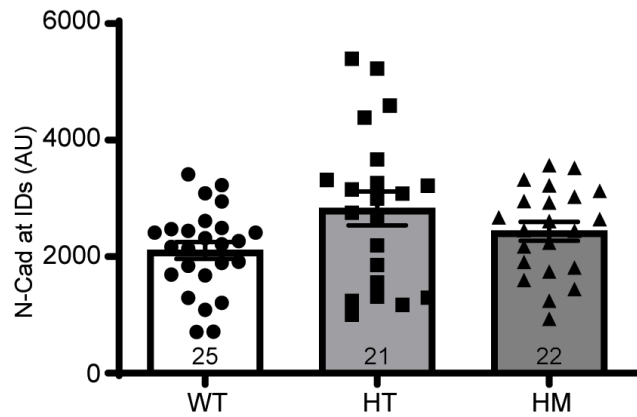

**Supplemental Figure 2. The quantification of N-cadherin at the intercalated discs of the heart sections of 2-3 weeks old mice.** There was no significant difference in N-Cad expression at intercalated discs among genotypes. Kruskal-Wallis test, followed by Dunn's multiple comparisons, with n=25, 21, and 22 images (WT, HT, and HM, respectively) from 7 (WT) or 6 (HT and HM) mice. Data represents mean  $\pm$  SEM.

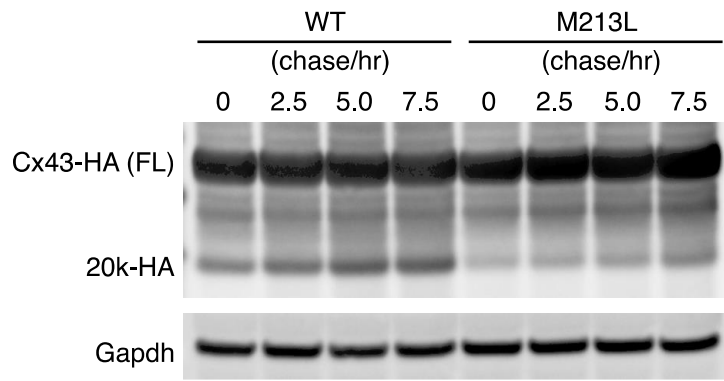

**Supplemental Figure 3. Expression of GJA1-20k in HEK293 cells transfected with WT and M213L mutated mouse Cx43.** A representative western blot of exogenously expressed, HA-tagged full length Cx43 (FL) and GJA1-20k protein. Gapdh was used as a loading control. n = 4 experiments.

**Table S2. Echocardiographic parameters of adult M213L mice (9-10 weeks old)**

|             | WT (n=8) |         | HT(n=5) |         | <i>P</i> value |
|-------------|----------|---------|---------|---------|----------------|
| LVAWd, mm   | 0.73     | ± 0.04  | 0.66    | ± 0.03  | 0.2082         |
| LVAWs, mm   | 1.11     | ± 0.06  | 1.02    | ± 0.06  | 0.4126         |
| LVIDd, mm   | 3.89     | ± 0.07  | 3.66    | ± 0.13  | 0.1826         |
| LVIDs, mm   | 2.70     | ± 0.09  | 2.52    | ± 0.17  | 0.5237         |
| LVPWd mm    | 0.67     | ± 0.06  | 0.74    | ± 0.06  | 0.6216         |
| LVPWs mm    | 0.96     | ± 0.06  | 1.02    | ± 0.09  | 0.4561         |
| HR, bpm     | 518.30   | ± 10.29 | 474.80  | ± 34.83 | 0.3543         |
| LVmass, mg  | 75.58    | ± 4.63  | 68.54   | ± 3.62  | 0.3543         |
| EF(LAX), %  | 58.48    | ± 1.68  | 60.65   | ± 1.81  | 0.2844         |
| FS(LAX), %  | 21.44    | ± 0.84  | 19.70   | ± 1.30  | 0.1709         |
| LVvol,d, μL | 55.52    | ± 3.65  | 43.61   | ± 2.26* | 0.0295         |
| LVvol,s, μL | 23.28    | ± 2.11  | 17.19   | ± 1.17  | 0.0932         |
| E/A         | 2.07     | ± 0.48  | 1.55    | ± 0.15  | 0.8329         |
| E/e'        | 18.44    | ± 2.66  | 18.44   | ± 1.69  | 0.9433         |

<sup>A</sup> \* *P* < 0.05 vs. WT, Mann-Whitney test with two-tailed *P* value. Data represents mean ± SEM.
